# Supplementary material for: Carcinoma-associated fibroblast-derived lysyl oxidase-rich extracellular vesicles mediate collagen crosslinking and promote epithelial-mesenchymal transition via p-FAK/p-paxillin/YAP signaling
Source: PubMed Central journal article supplement (PMC10397209; doi:10.1038/s41368-023-00236-1), 2023-08-02
Supplement: 41368_2023_236_MOESM3_ESM.pdf [file 41368_2023_236_MOESM3_ESM.pdf]

**Carcinoma-associated fibroblast-derived lysyl oxidase-rich extracellular vesicles mediate collagen crosslinking and promote epithelial-mesenchymal transition via p-FAK/p-paxillin/YAP signaling**

Xue Liu,<sup>1, 2, 3, 4</sup> Jiao Li,<sup>1, 2, 3, 4</sup> Xuesong Yang,<sup>5</sup> Xiaojie Li,<sup>4</sup> Jing Kong,<sup>4</sup> Dongyuan Qi,<sup>6</sup> Fuyin Zhang,<sup>7</sup> Bo Sun,<sup>7</sup> Yuehua Liu<sup>2, 3 \*</sup>, Tingjiao Liu<sup>1, 2 \*</sup>

<sup>1</sup>*Department of Oral Pathology, Shanghai Stomatological Hospital & School of Stomatology, Fudan University, Tianjin Road No.2, Huangpu District, Shanghai 200001, China.*

<sup>2</sup>*Shanghai Key Laboratory of Craniomaxillofacial Development and Diseases, Fudan University, Tianjin Road No.2, Huangpu District, Shanghai 200001, China.*

<sup>3</sup>*Department of Orthodontics, Shanghai Stomatological Hospital & School of Stomatology, Fudan University, East Beijing Road No.356, Huangpu District, Shanghai 200001, China.*

<sup>4</sup>*School of Stomatology, Dalian Medical University, West Section No.9, South Road of Lvshun, Dalian 116044, China.*

<sup>5</sup>*Department of Biochemistry and Molecular Biology, Liaoning Provincial Core Lab of Glycobiology and Glycoengineering, Dalian Medical University, West Section No.9, South Road of Lvshun, Dalian 116044, China.*

<sup>6</sup>*Department of Oral Surgery, the First Affiliated Hospital of Dalian Medical University, No.222 Zhongshan Road, Dalian 116023, China.*

<sup>7</sup>*Department of Oral Surgery, the Second Affiliated Hospital of Dalian Medical University, No.467 Zhongshan Road, Dalian 116023, China.*

\* Correspondence: [tingjiao\\_liu@fudan.edu.cn](mailto:tingjiao_liu@fudan.edu.cn); [liyuehua@fudan.edu.cn](mailto:liyuehua@fudan.edu.cn)

<sup>1</sup>*Department of Oral Pathology, Shanghai Stomatological Hospital & School of Stomatology, Fudan University, Tianjin Road No.2, Huangpu District, Shanghai 200001, China.*

## Supplementary table

**Table S1a** Clinical and pathological parameters in patients with OSCC

| Characteristics | Cases |
|-----------------|-------|
| <b>Gender</b>   |       |
| Male            | 16    |
| Female          | 14    |
| <b>Age</b>      |       |
| ≤ 62 year       | 17    |
| ≥ 62 year       | 13    |
| <b>Sites</b>    |       |
| Palate          | 4     |
| Buccal mucosa   | 3     |
| tongue          | 8     |
| Lip             | 4     |
| gingiva         | 5     |
| Mouth floor     | 1     |
| Pharynx         | 1     |
| Submandibular   | 2     |
| Mandible        | 2     |
| <b>Grade</b>    |       |
| I               | 14    |
| II              | 11    |
| III             | 5     |

**Table S1b** Correlation coefficients between LOX and clinical parameters in OSCC patients

| Variables | LOX    | Gender | Age    | Sites  | Grade |
|-----------|--------|--------|--------|--------|-------|
| LOX       | 1      |        |        |        |       |
| Gender    | -0.077 | 1      |        |        |       |
| Age       | 0.189  | 0.101  | 1      |        |       |
| Sites     | 0.211  | 0.255  | 0.037  | 1      |       |
| Grade     | -0.171 | -0.139 | -0.298 | -0.224 | 1     |

Note: Pearson correlation analysis was used for continuous variables; Spearman correlation analysis was used for category variables. P-value < 0.05
